# Supplementary material
Source: PubMed Central journal article supplement (PMC8740675)
Supplement: JSLHR-64-2325-s001.pdf [file JSLHR-64-2325-s001.pdf]

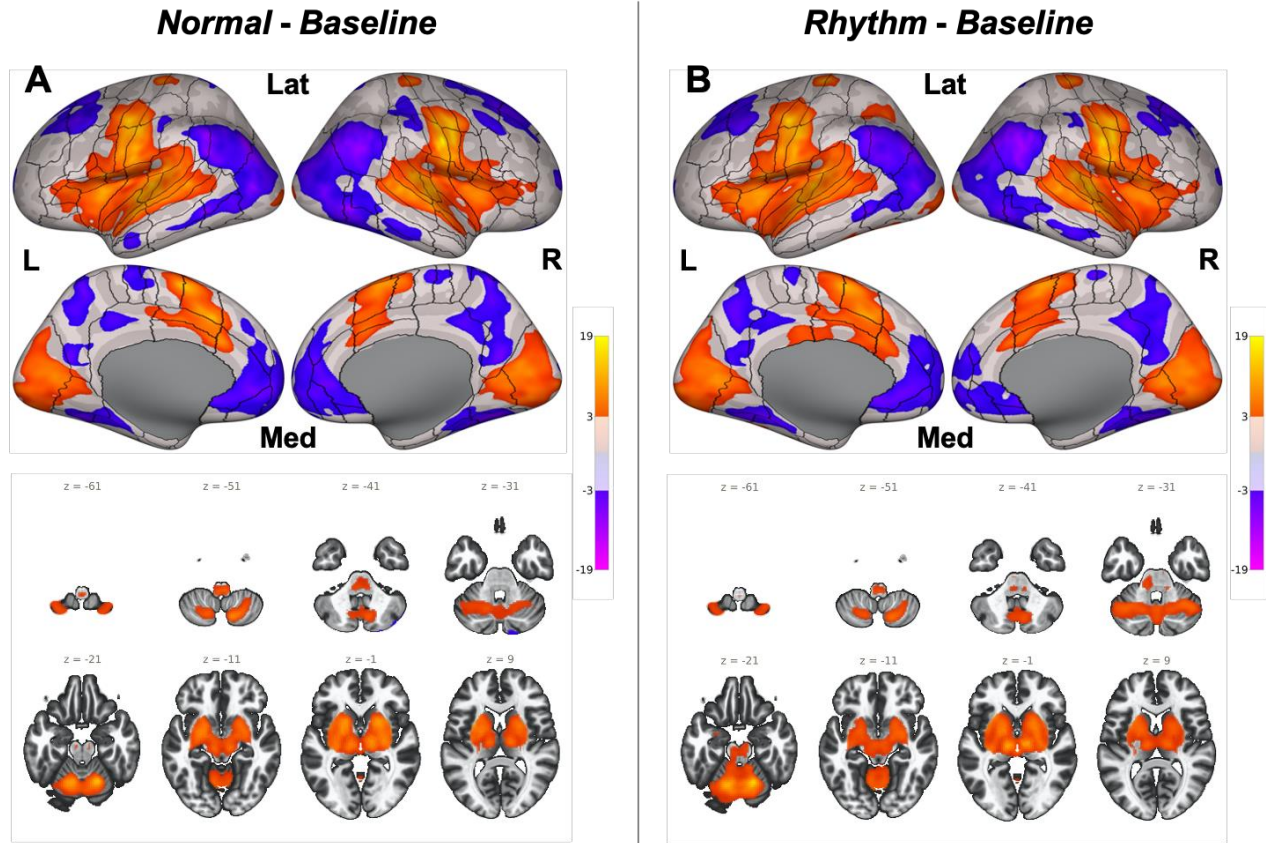

**Supplemental Figure S1.** Significant clusters for the (A) *normal - baseline* or (B) *rhythm - baseline* contrasts collapsed across both groups (vertex-wise  $p < .01$ , cluster-wise  $p_{FDR} < .05$ ). Cortical results (top) are displayed on an inflated cortical surface, along with the full cortical ROI parcellation of the SpeechLabel atlas described in Cai et al. (2014). Subcortical and cerebellar results (bottom) are displayed on an axial slice series of a template brain. Color shading indicates t-values. L = left, R = right, Lat = lateral surface, Med = medial surface.
