# Supplementary material
Source: PubMed Central journal article supplement (PMC8740675)
Supplement: JSLHR-64-2325-s004.pdf [file JSLHR-64-2325-s004.pdf]

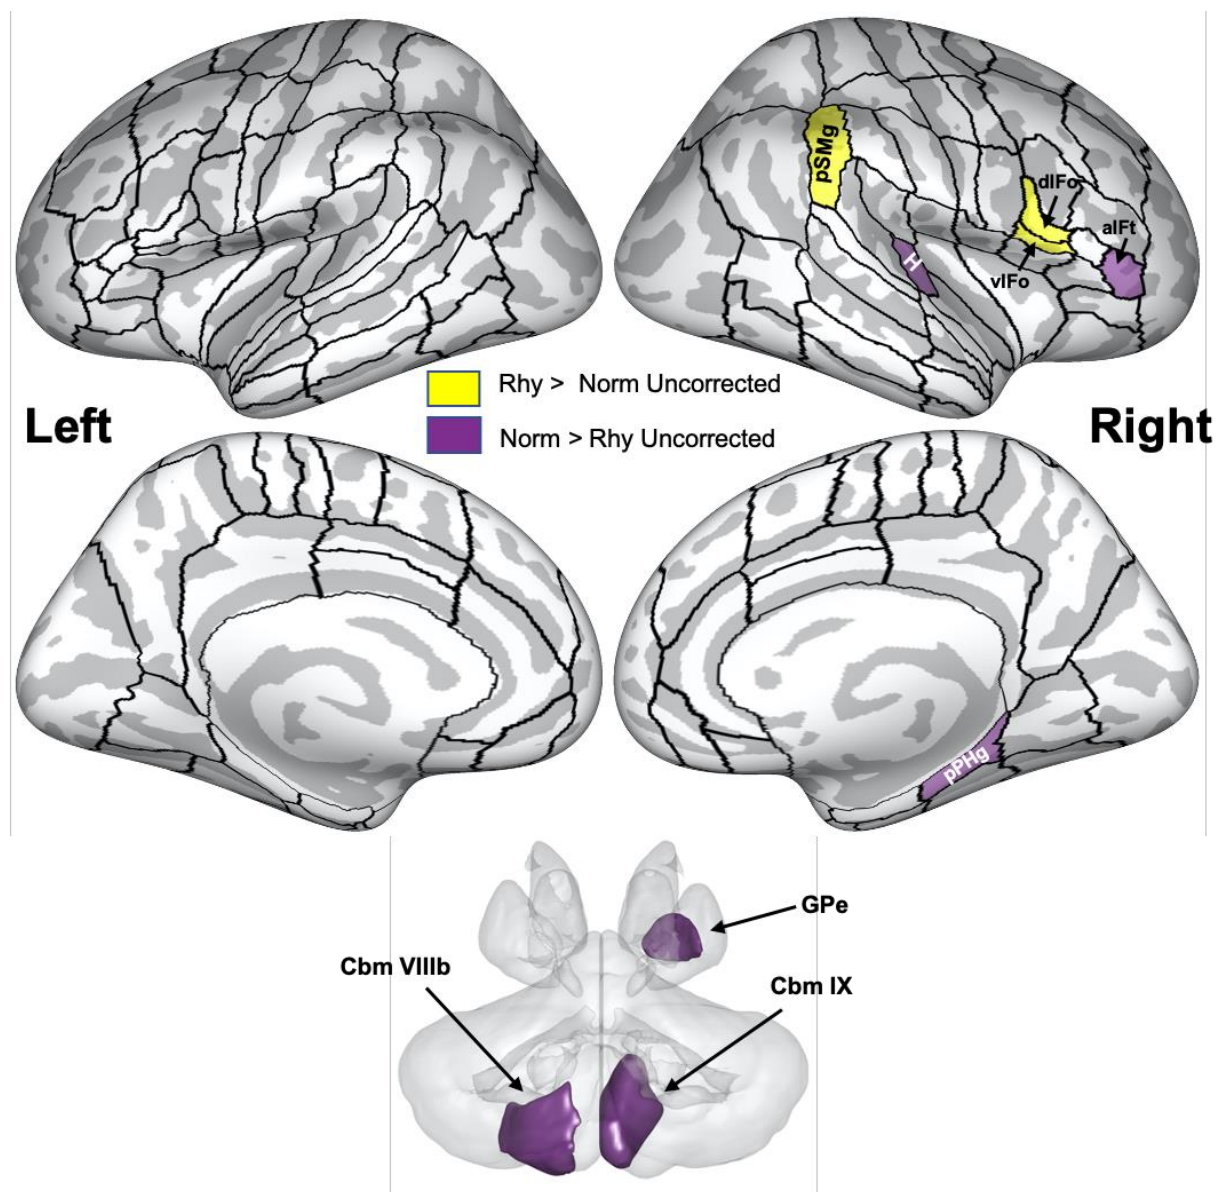

**Supplemental Figure S4.** Exploratory regions-of-interest (ROIs) significantly more active during the *rhythm* condition than the *normal* condition for AWS in the exploratory analysis ( $p < .05$ ) are highlighted in yellow and plotted on an inflated cortical surface. ROIs highlighted in purple were significantly more active during the *normal* condition than the *rhythm* condition ( $p < .05$ ). Black outlines indicate cortical ROIs used in the exploratory analysis. aIFt = anterior inferior frontal gyrus pars triangularis, dlFo = dorsal inferior frontal gyrus pars opercularis, Cbm = cerebellum, GPe = external portion of the globus pallidus, H = Heschl's gyrus, pPHg = posterior parahippocampal gyrus, pSMg = posterior supramarginal gyrus, vIFo = ventral inferior frontal gyrus pars opercularis.
