# Supplementary material
Source: PubMed Central journal article supplement (PMC8740675)
Supplement: JSLHR-64-2325-s005.pdf [file JSLHR-64-2325-s005.pdf]

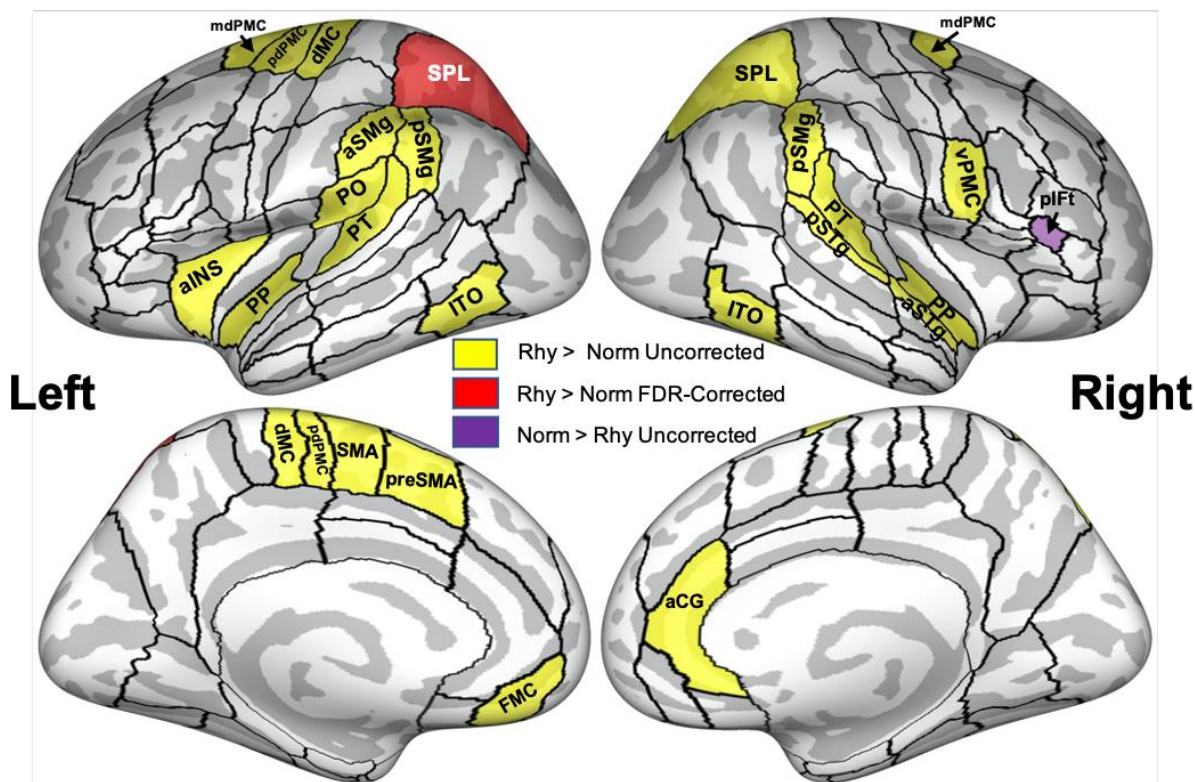

**Supplemental Figure S5.** Exploratory regions-of-interest (ROIs) significantly more active during the *rhythm* condition than the *normal* condition for ANS in the exploratory analysis ( $p < .05$ ) are highlighted in yellow and plotted on an inflated cortical surface. ROIs highlighted in red and labeled reached significance at a stricter threshold of  $p_{FDR} < .05$ . ROIs highlighted in purple were significantly more active during the *normal* condition than the *rhythm* condition ( $p < .05$ ). Black outlines indicate cortical ROIs used in the exploratory analysis. FDR = false discovery rate, aCG = anterior cingulate gyrus, aINS = anterior insula, aSMg = anterior supramarginal gyrus, aSTg = anterior superior temporal gyrus, dMC = dorsal primary motor cortex, FMC = fronto-medial cortex, ITO = inferior temporo-occipital cortex, mdPMC = middle dorsal premotor cortex, pdPMC = posterior dorsal premotor cortex, pIFt = posterior inferior frontal gyrus pars triangularis, PP = planum polare, preSMA = presupplementary motor area, pSMg = posterior supramarginal gyrus, pSTg = posterior superior temporal gyrus, PT = planum temporale, SMA = supplementary motor area, SPL = superior parietal lobule, vPMC = ventral premotor cortex.
