# Supplementary material
Source: PubMed Central journal article supplement (PMC8740675)
Supplement: JSLHR-64-2325-s006.pdf [file JSLHR-64-2325-s006.pdf]

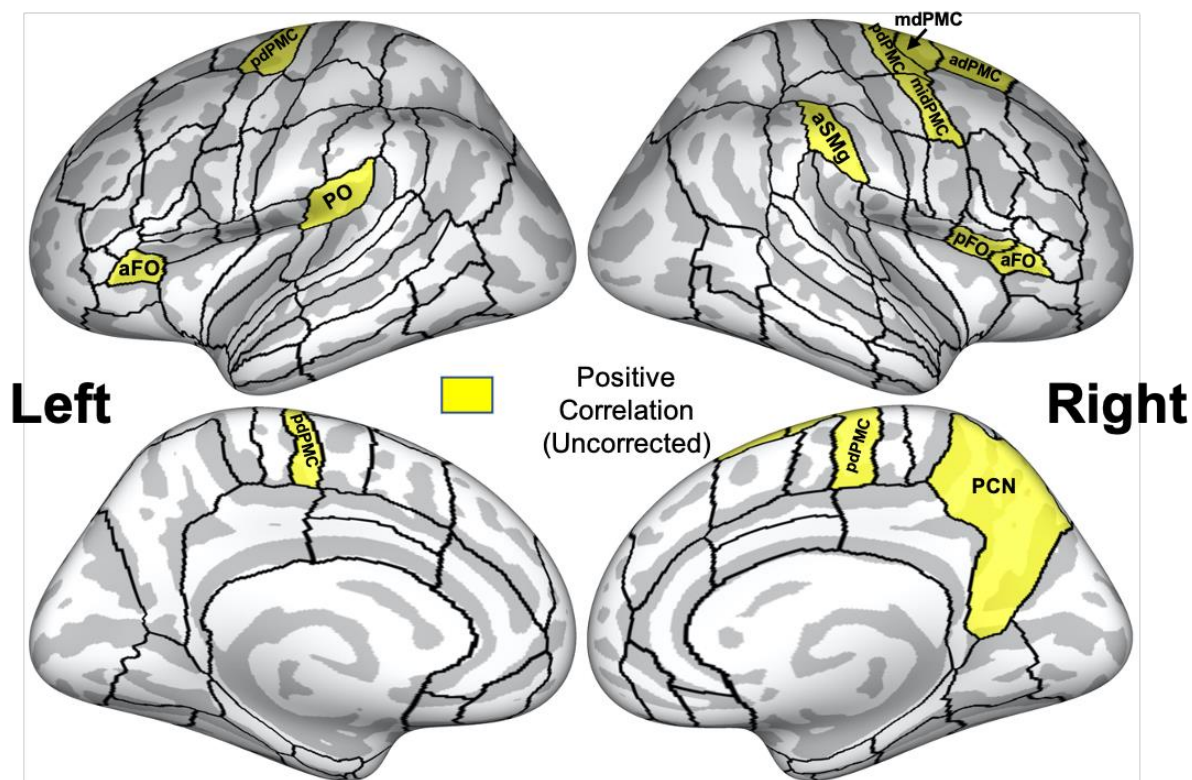

**Supplemental Figure S6.** Exploratory regions-of-interest (ROIs) with a positive correlation between *normal – baseline* activation and SSI-Mod in AWS ( $p < .05$ ) are highlighted in yellow and plotted on an inflated cortical surface. Black outlines indicate cortical ROIs used in the exploratory analysis. adPMC = anterior dorsal premotor cortex, aFO = anterior frontal operculum, aSMg = anterior supramarginal gyrus, mdPMC = middle dorsal premotor cortex, PCN = precuneus, pdPMC = posterior dorsal premotor cortex, pFO = posterior frontal operculum, PO = parietal operculum.
