# Supplementary material
Source: PubMed Central journal article supplement (PMC8740675)
Supplement: JSLHR-64-2325-s007.pdf [file JSLHR-64-2325-s007.pdf]

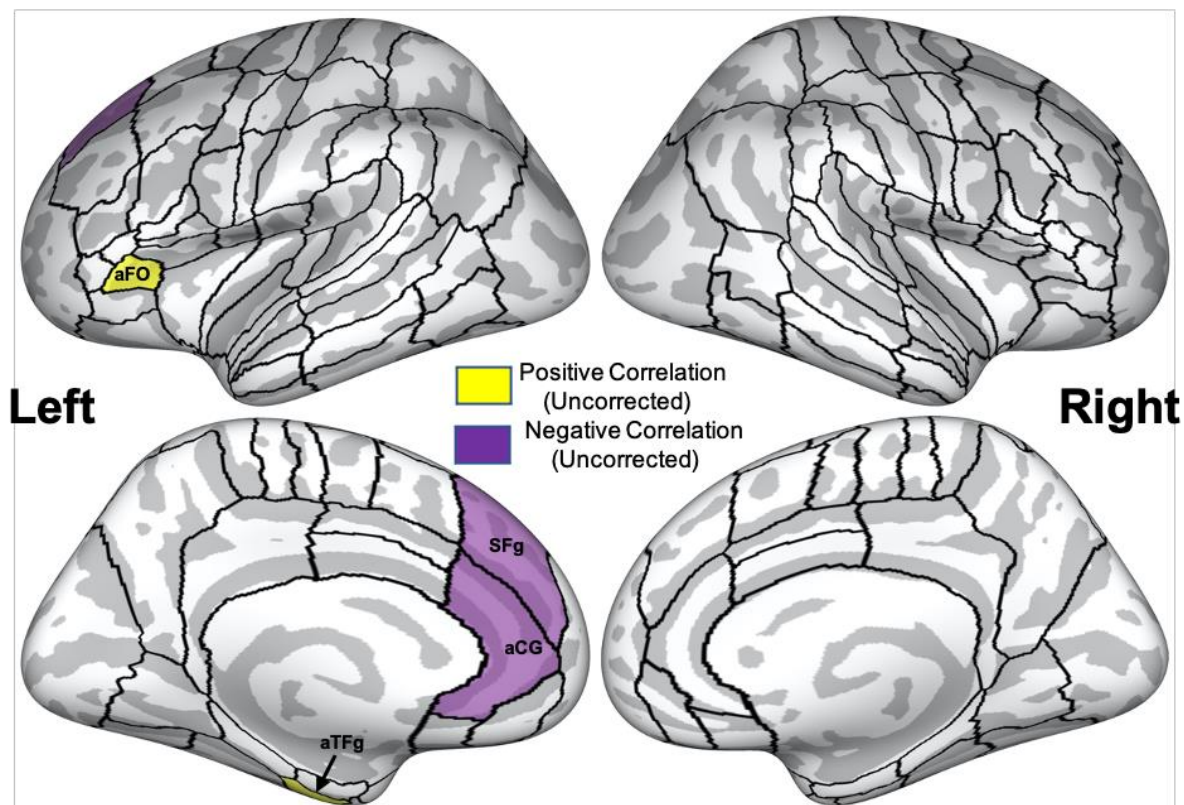

**Supplemental Figure S7.** Exploratory regions-of-interest (ROIs) with a positive correlation between *rhythm – baseline* activation and SSI-Mod in AWS ( $p < .05$ ) are highlighted in yellow and plotted on an inflated cortical surface. ROIs highlighted in purple were negatively correlated with SSI-Mod ( $p < .05$ ). Black outlines indicate cortical ROIs used in the exploratory analysis. aCG = anterior cingulate gyrus, aFO = anterior frontal operculum, aTFg = anterior temporal fusiform gyrus, SFg = superior frontal gyrus.
