# Supplementary material
Source: PubMed Central journal article supplement (PMC8740675)
Supplement: JSLHR-64-2325-s008.pdf [file JSLHR-64-2325-s008.pdf]

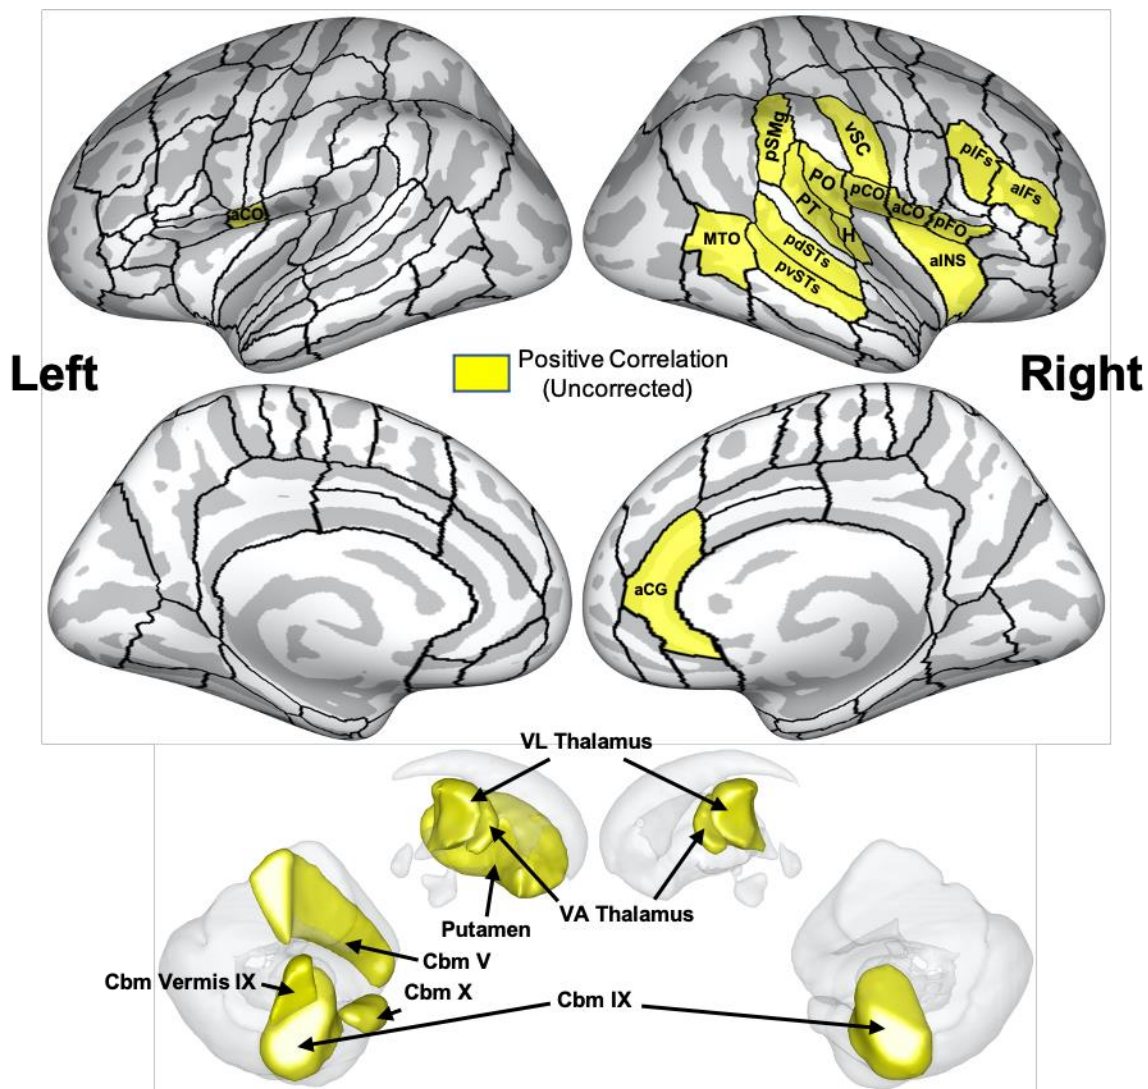

**Supplemental Figure S8.** Exploratory regions-of-interest (ROIs) with a positive correlation between *normal-baseline* activation and Disfluency Rate in AWS ( $p < .05$ ) are highlighted in yellow and plotted on an inflated cortical surface. Black outlines indicate cortical ROIs used in the exploratory analysis. aCG = anterior cingulate gyrus, aCO = anterior central operculum, aIFs = anterior inferior frontal sulcus, aINS = anterior insula, Cbm = cerebellum, H = Heschl’s gyrus, MTO = middle temporo-occipital cortex, pCO = posterior central operculum, pdSTs = posterior dorsal superior temporal sulcus, pFO = posterior frontal operculum, pIFs = posterior inferior frontal sulcus, PO = parietal operculum, pSMg = posterior supramarginal gyrus, PT = planum temporale, pvSTs = posterior ventral superior temporal sulcus, VA = ventral anterior, VL = ventral lateral, vSC = ventral primary somatosensory cortex.
