# Supplementary material
Source: PubMed Central journal article supplement (PMC8740675)
Supplement: JSLHR-64-2325-s009.pdf [file JSLHR-64-2325-s009.pdf]

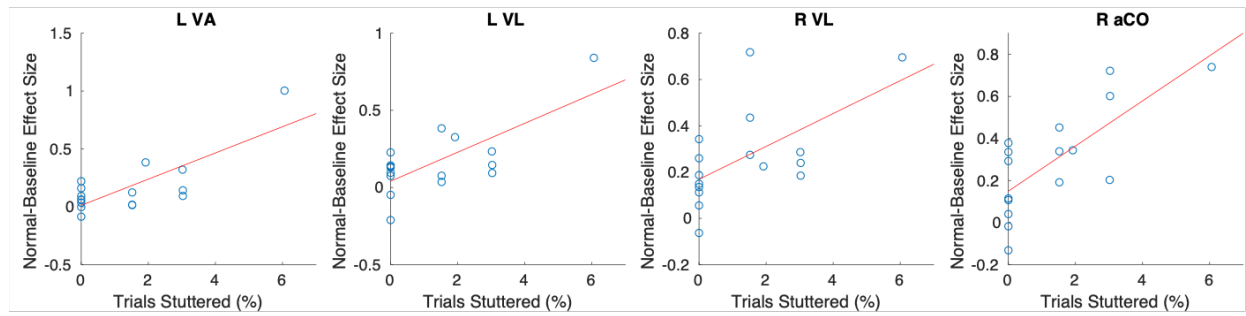

**Supplemental Figure S9.** Across-subjects correlation between *normal – baseline* activation and Disfluency Rate for AWS in four highly significant exploratory regions-of-interest (ROIs;  $p < .005$ ). Blue circles indicate individual AWS. L = left, R = right, VA = ventral anterior portion of the thalamus, VL = ventral lateral portion of the thalamus, aCO = anterior central operculum.
