# Supplementary material
Source: PubMed Central journal article supplement (PMC8740675)
Supplement: JSLHR-64-2325-s010.pdf [file JSLHR-64-2325-s010.pdf]

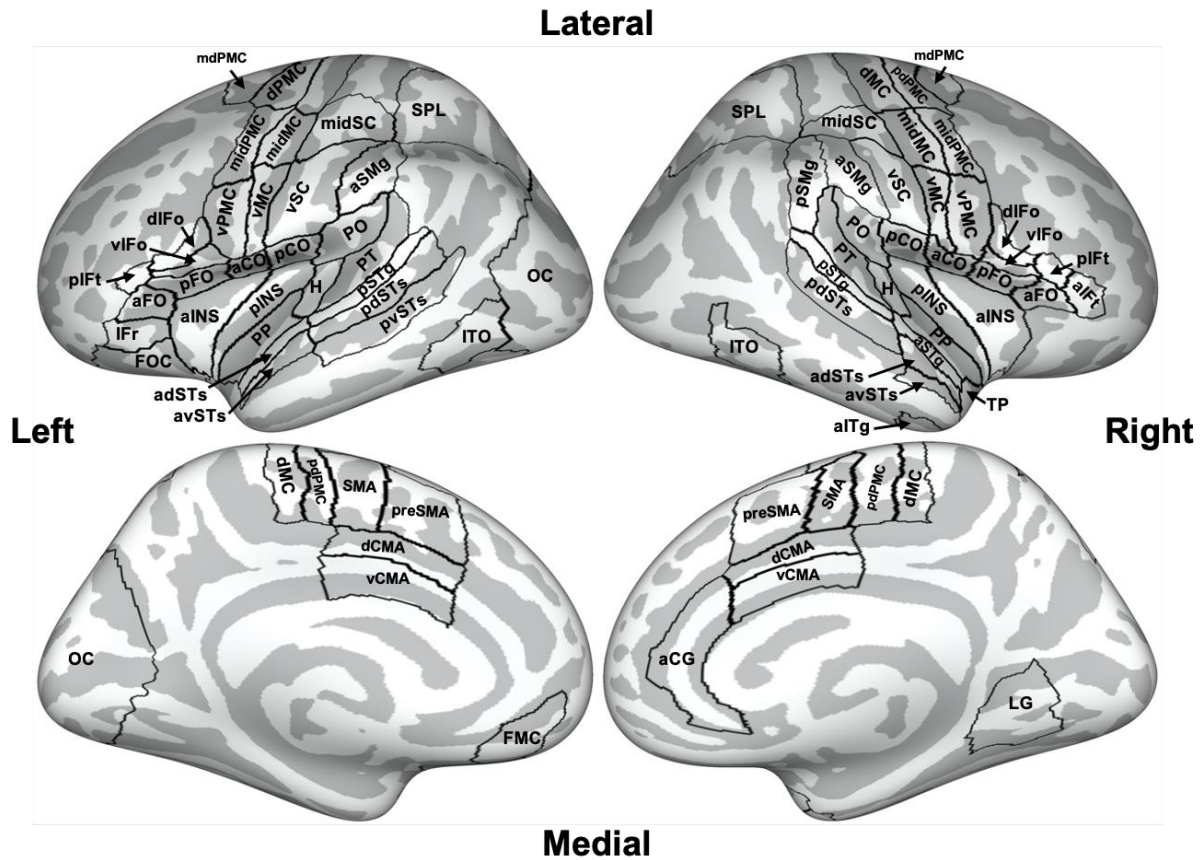

**Supplemental Figure S10.** Cortical regions-of-interest included as seed regions in the functional connectivity analyses. aIFt = anterior inferior frontal gyrus pars triangularis, pIFt = posterior inferior temporal gyrus pars triangularis, aFO = anterior frontal operculum, pFO = posterior frontal operculum, dIFo = dorsal inferior frontal gyrus pars opercularis, vIFo = ventral inferior frontal gyrus pars opercularis, aINS = anterior insula, pINS = posterior insula, vPMC = ventral premotor cortex, midPMC = mid premotor cortex, pdPMC = posterior dorsal premotor cortex, mdPMC = middle dorsal premotor cortex, vMC = ventral primary motor cortex, midMC = middle primary motor cortex, dMC = dorsal primary motor cortex, vSC = ventral primary somatosensory cortex, midSC = middle primary somatosensory cortex, aCO = anterior central operculum, pCO = posterior central operculum, PO = parietal operculum, aSMg = anterior supramarginal gyrus, pSMg = posterior supramarginal gyrus, PT = planum temporale, H = Heschl’s gyrus, PP = planum polare, aSTg = anterior superior temporal gyrus, pSTg = posterior superior temporal gyrus, adSTs = anterior dorsal superior temporal sulcus, avSTs = anterior ventral superior temporal sulcus, pdSTs = posterior dorsal superior temporal sulcus, pvSTs = posterior ventral superior temporal sulcus, TP = temporal pole, alTg = anterior inferior temporal gyrus, ITO = inferior temporo-occipital cortex, SPL = superior parietal lobule, OC = occipital cortex, LG = lingual gyrus, SMA = supplementary motor area, preSMA = presupplementary motor area, dCMA = dorsal cingulate motor area, vCMA = ventral cingulate motor area, aCG = anterior cingulate gyrus, IFR = inferior frontal gyrus pars orbitalis, FOC = fronto-orbital cortex, FMC = fronto-medial cortex.
