# Supplementary material
Source: PubMed Central journal article supplement (PMC8740675)
Supplement: JSLHR-64-2325-s011.pdf [file JSLHR-64-2325-s011.pdf]

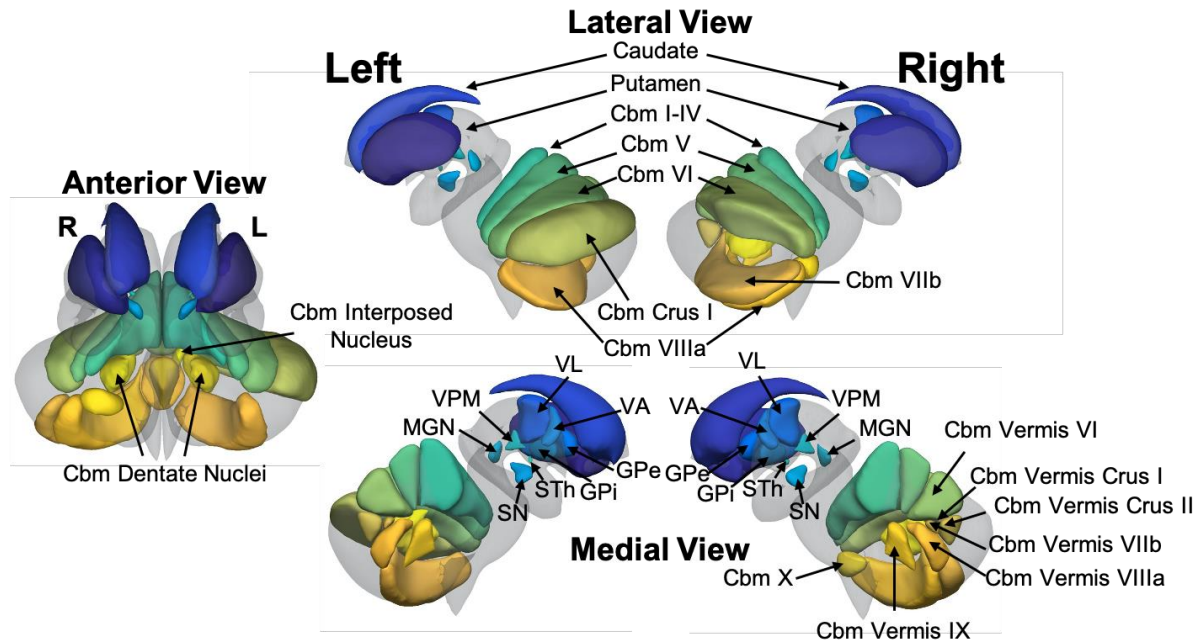

**Supplemental Figure S11.** Subcortical regions-of-interest included as seed regions in the functional connectivity analyses. L = left, R = right, Cbm = cerebellum, VA = ventral anterior portion of the thalamus, VL = ventral lateral portion of the thalamus, VPM = ventral posteromedial thalamic nucleus, MGN = medial geniculate nucleus of the thalamus, GPe = external portion of the globus pallidus, GPi = internal portion of the globus pallidus, STh = subthalamic nucleus, SN = substantia nigra.
