# Supplementary material
Source: PubMed Central journal article supplement (PMC8740675)
Supplement: JSLHR-64-2325-s012.pdf [file JSLHR-64-2325-s012.pdf]

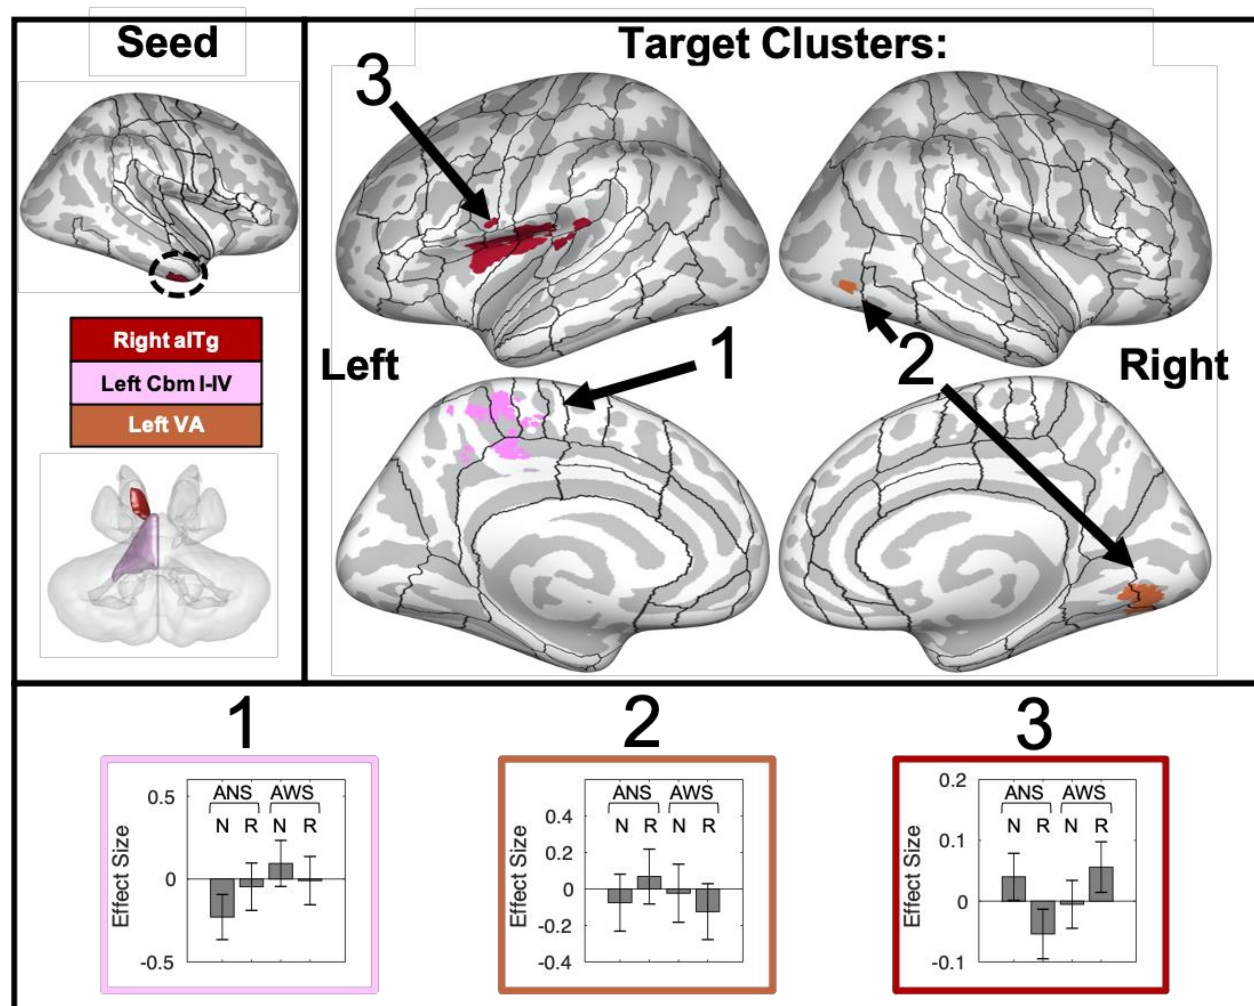

**Supplemental Figure S12.** A summary of functional connections that show significant interactions between group and condition. Seed regions for these connections are indicated in the upper left panel on an inflated right hemisphere cortical surface (top; ROIs are as in Supplemental Figure S10) or on a transparent 3D rendering of the cerebellum and subcortical structures viewed posteriorly (bottom). Colors in the rest of the figure refer back to these seed regions. Three target clusters (representing three distinct connections) are displayed in the upper right portion of the figure. Target clusters are projected onto an inflated surface of cerebral cortex, along with the full cortical ROI parcellation of the SpeechLabel atlas described in Cai et al. (2014). The bottom portion of the figure shows the connectivity effect sizes for each connection in the *normal* and *rhythm* conditions, separately for each group. Error bars indicate 90% confidence intervals. N = normal, R = rhythm, aITg = anterior inferior temporal gyrus, Cbm = cerebellum, VA = ventral anterior portion of the thalamus.
