# Supplementary material
Source: PubMed Central journal article supplement (PMC8740675)
Supplement: JSLHR-64-2325-s014.pdf [file JSLHR-64-2325-s014.pdf]

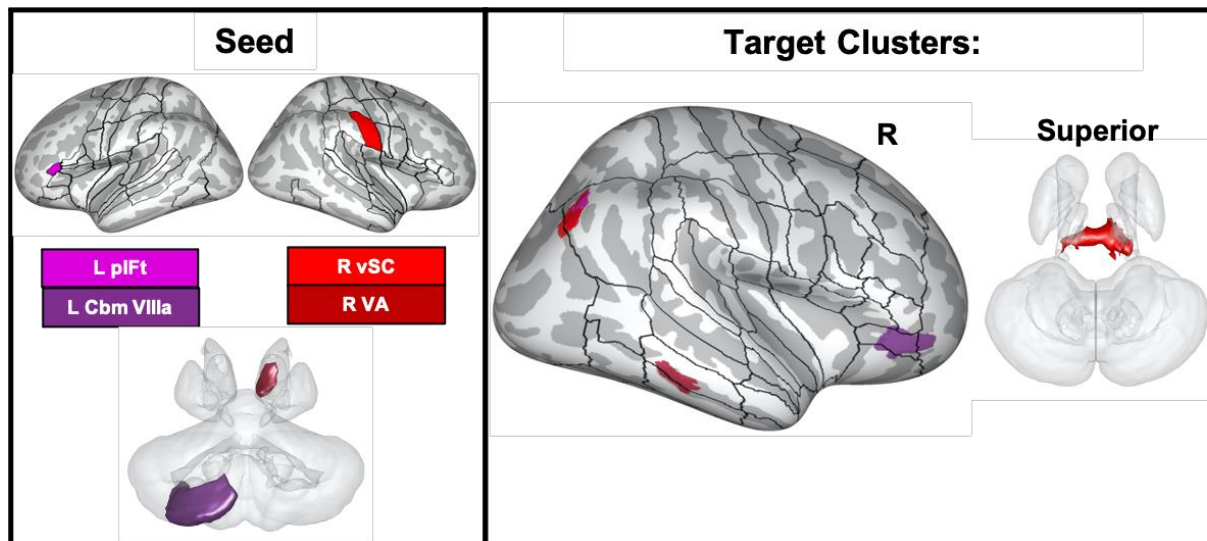

**Supplemental Figure S14.** A summary of functional connectivity (*normal - baseline*) positively correlated with stuttering severity in AWS. Seed regions for these connections are indicated in the left panel either on an inflated cortical surface (top; ROIs are as in Supplemental Figure S10) or on a transparent 3D rendering of subcortical structures viewed posteriorly (bottom). Colors in the rest of the figure refer back to these seed regions. Five target clusters (representing five distinct connections) are displayed in the right portion of the figure. These clusters are either projected onto an inflated surface of the right hemisphere cerebral cortex, along with the cortical ROI parcellation of the SpeechLabel atlas described in Cai et al. (2014), or plotted on a 3D rendering of subcortical structures (viewed superiorly). L = left, R = right, pIFt = posterior inferior frontal gyrus pars triangularis, Cbm = cerebellum, vSC = ventral primary somatosensory cortex, VA = ventral anterior portion of the thalamus.
