# Supplementary material
Source: PubMed Central journal article supplement (PMC8740675)
Supplement: JSLHR-64-2325-s015.pdf [file JSLHR-64-2325-s015.pdf]

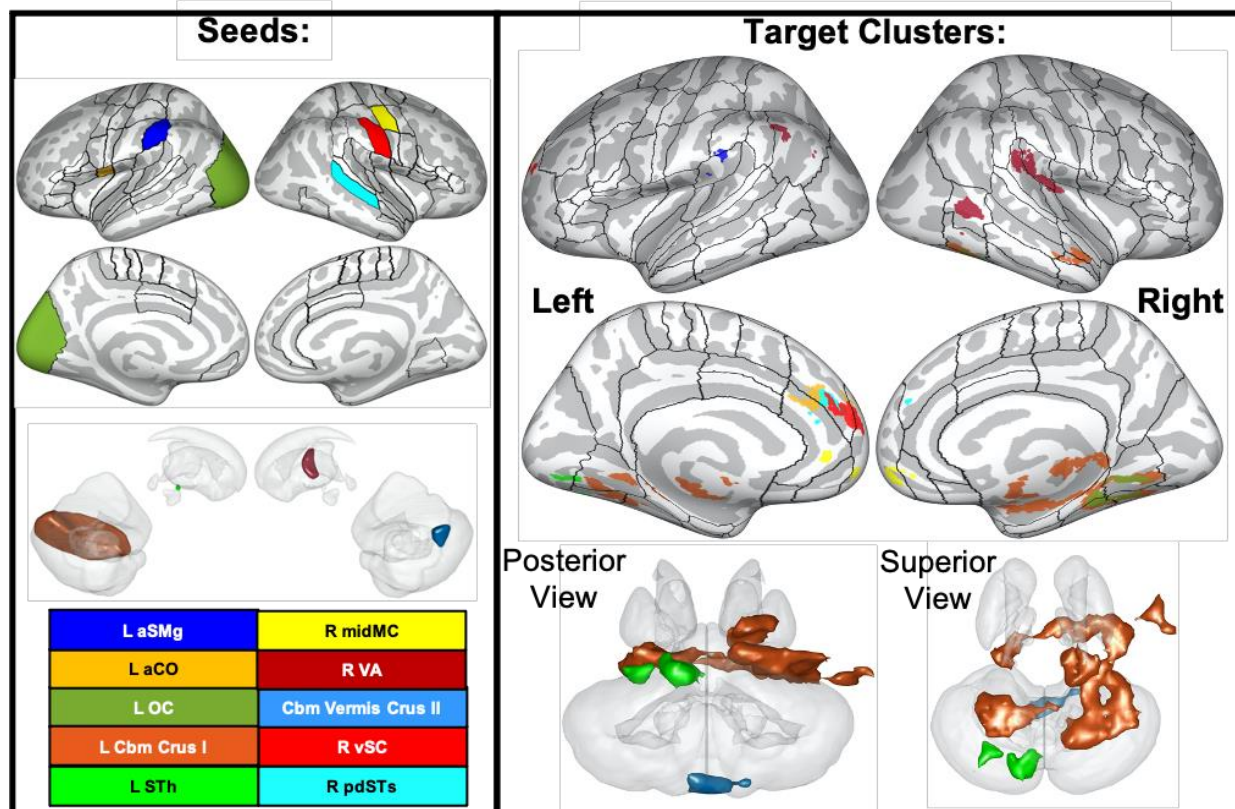

**Supplemental Figure S15.** A summary of functional connectivity (*normal - baseline*) negatively correlated with stuttering severity in AWS. Seed regions for these connections are indicated in the left panel either on an inflated cortical surface (top; ROIs are as in Supplemental Figure S10) or on a transparent 3D rendering of subcortical structures in each hemisphere viewed medially (bottom). Colors in the rest of the figure refer back to these seed regions. Thirteen target clusters (representing thirteen distinct connections) are displayed in the right portion of the figure. These clusters are either projected onto an inflated cortical surface, along with the cortical ROI parcellation of the SpeechLabel atlas described in Cai et al. (2014), or plotted on a 3D rendering of subcortical structures viewed either posteriorly (left) or superiorly (right). L = left, R = right, aSMg = anterior supramarginal gyrus, aCO = anterior central operculum, OC = occipital cortex, Cbm = cerebellum, STh = subthalamic nucleus, midMC = middle primary motor cortex, VA = ventral anterior portion of the thalamus, vSC = ventral primary somatosensory cortex, pdSTs = posterior dorsal superior temporal sulcus.
