# Supplementary material
Source: PubMed Central journal article supplement (PMC8740675)
Supplement: JSLHR-64-2325-s016.pdf [file JSLHR-64-2325-s016.pdf]

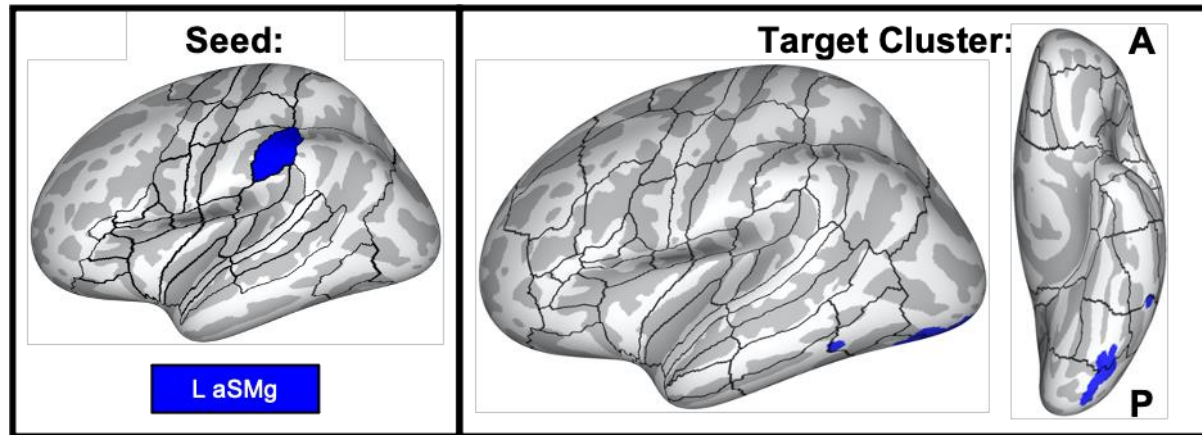

**Supplemental Figure S16.** A summary of functional connectivity (*rhythm - baseline*) positively correlated with stuttering severity in AWS. The seed region for this connection is indicated in the left panel on an inflated left hemisphere cortical surface (ROIs are as in Supplemental Figure S10). Colors in the rest of the figure refer back to this region. One target cluster is displayed in the right portion of the figure, projected onto an inflated surface of the left hemisphere cerebral cortex, and viewed from the left (left) or inferiorly (right). L = left, A = anterior, P = posterior, aSMg = anterior supramarginal gyrus.
