# Supplementary material
Source: PubMed Central journal article supplement (PMC8740675)
Supplement: JSLHR-64-2325-s017.pdf [file JSLHR-64-2325-s017.pdf]

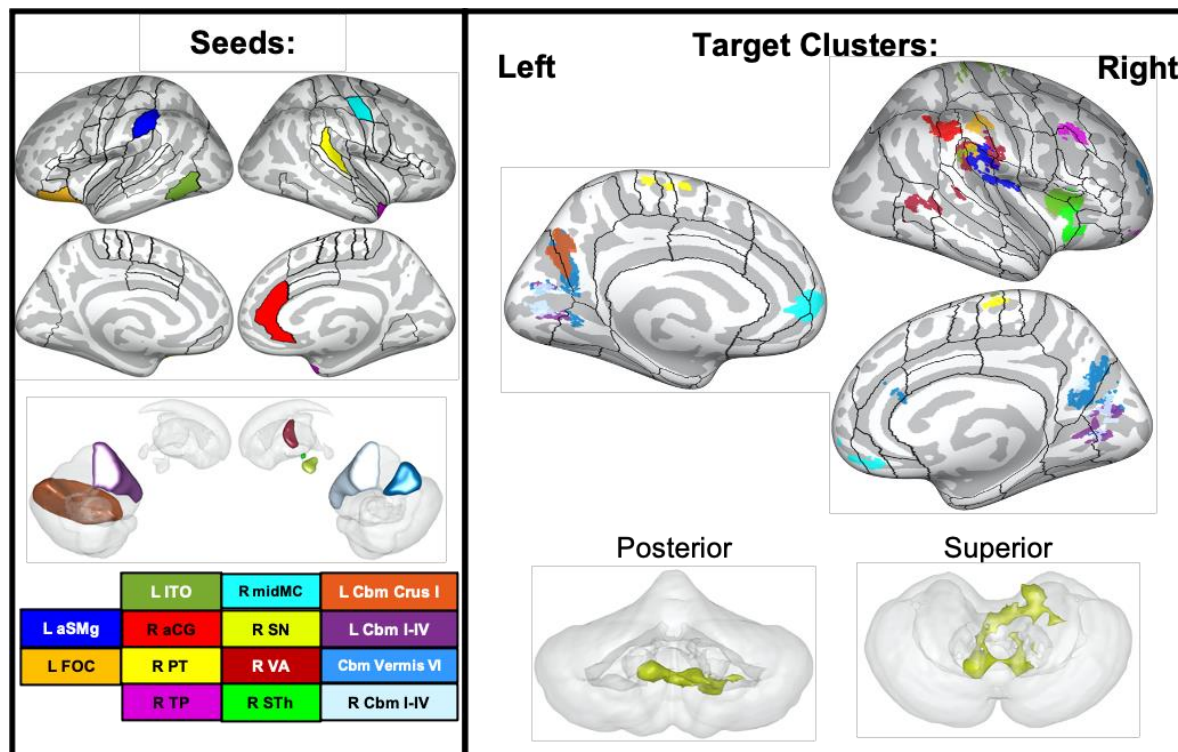

**Supplemental Figure S17.** A summary of functional connectivity (*rhythm - baseline*) negatively correlated with stuttering severity in AWS. Seed regions for these connections are indicated in the left panel either on an inflated cortical surface (top; ROIs are as in Supplemental Figure S10) or on a transparent 3D rendering of subcortical structures in each hemisphere viewed medially (bottom). Colors in the rest of the figure refer back to these seed regions. Nineteen target clusters (representing nineteen distinct connections) are displayed in the right portion of the figure. These clusters are either projected onto an inflated cortical surface, along with the cortical ROI parcellation of the SpeechLabel atlas described in Cai et al. (2014), or plotted on a 3D rendering of the cerebellum viewed either posteriorly (left) or superiorly (right). L = left, R = right, aSMg = anterior supramarginal gyrus, FOC = fronto-orbital cortex, ITO = inferior temporo-occipital cortex, aCG = anterior cingulate gyrus, PT = planum temporale, TP = temporal pole, midMC = middle primary motor cortex, SN = substantia nigra, VA = ventral anterior portion of the thalamus, STh = subthalamic nucleus, Cbm = cerebellum.
