# Supplementary material
Source: PubMed Central journal article supplement (PMC8740675)
Supplement: JSLHR-64-2325-s018.pdf [file JSLHR-64-2325-s018.pdf]

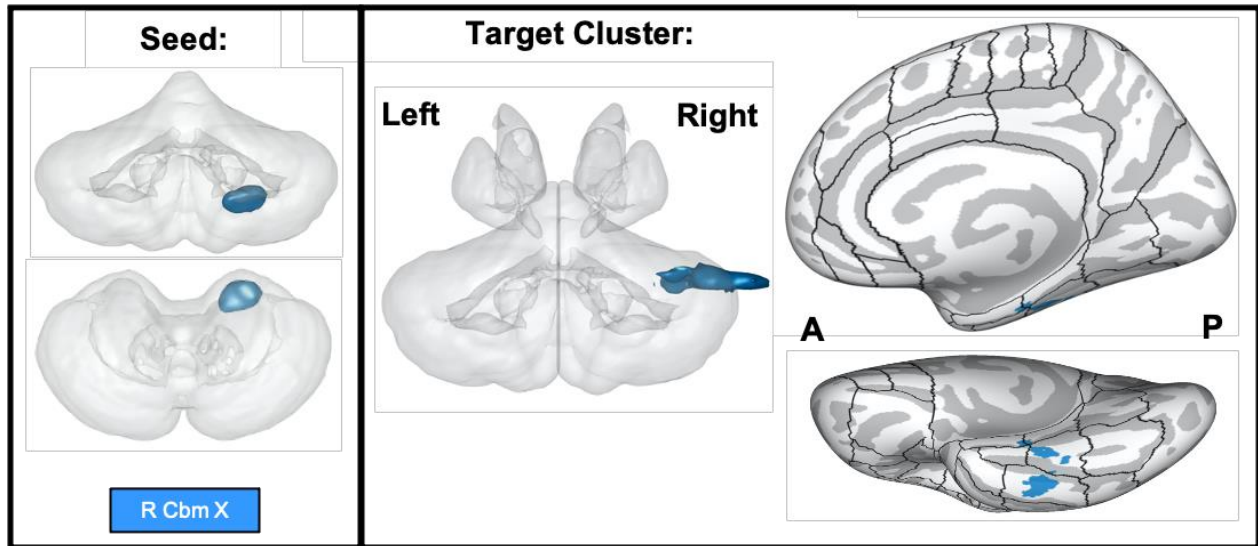

**Supplemental Figure S18.** A summary of functional connectivity (*normal - baseline*) positively correlated with Disfluency Rate in AWS. The seed region for this connection is indicated in the left panel on a 3D rendering of the cerebellum viewed either posteriorly (top) or superiorly (bottom). Colors in the rest of the figure refer back to this region. One target cluster is displayed in the right portion of the figure, either plotted on a 3D rendering of subcortical structures viewed posteriorly (left) or projected onto an inflated surface of the right hemisphere cerebral cortex, and viewed from the left (right top) or inferiorly (right bottom). R = right, A = anterior, P = posterior, Cbm = cerebellum.
