# Supplementary material
Source: PubMed Central journal article supplement (PMC8740675)
Supplement: JSLHR-64-2325-s019.pdf [file JSLHR-64-2325-s019.pdf]

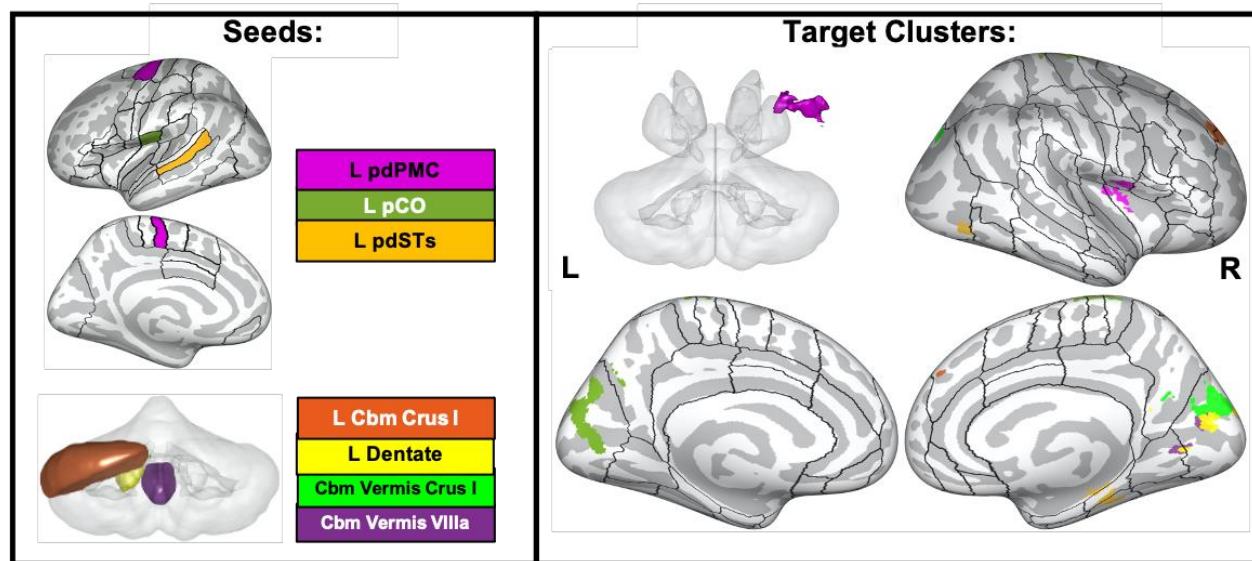

**Supplemental Figure S19.** A summary of functional connectivity (*normal - baseline*) negatively correlated with Disfluency Rate in AWS. Seed regions for these connections are indicated in the left panel either on an inflated left hemisphere cortical surface (top; ROIs are as in Supplemental Figure S10) or on a transparent 3D rendering of the cerebellum viewed posteriorly (bottom). Colors in the rest of the figure refer back to these seed regions. Eight target clusters (representing eight distinct connections) are displayed in the right portion of the figure. These clusters are either plotted on a 3D rendering of subcortical structures viewed posteriorly (top left), or projected onto an inflated cortical surface, along with the cortical ROI parcellation of the SpeechLabel atlas described in Cai et al. (2014). L = left, R = right, pdPMC = posterior dorsal premotor cortex, pCO = posterior central operculum, pdSTs = posterior dorsal superior temporal sulcus, Cbm = cerebellum.
