# Supplementary material
Source: PubMed Central journal article supplement (PMC8740675)
Supplement: JSLHR-64-2325-s020.pdf [file JSLHR-64-2325-s020.pdf]

| ROI                                    | Hemisphere | <i>t</i> -value | <i>p</i> -unc |
|----------------------------------------|------------|-----------------|---------------|
| <i>AWS &gt; ANS, Normal - Baseline</i> |            |                 |               |
| MTO                                    | Left       | 3.15            | .0039         |
| pMTg                                   | Left       | 2.77            | .0100         |
| avSTs                                  | Left       | 2.14            | .0415         |
| <i>ANS &gt; AWS, Normal - Baseline</i> |            |                 |               |
| Cbm Vermis X                           | Midline    | 2.06            | .0490         |
| <i>ANS &gt; AWS, Rhythm - Baseline</i> |            |                 |               |
| aFO                                    | Left       | 2.84            | .0086         |
| aMTg                                   | Right      | 2.16            | .0400         |
| Cbm Vermis VIIIb                       | Midline    | 2.86            | .0082         |
| Cbm Vermis VIIIa                       | Midline    | 2.14            | .0417         |
| Cbm X                                  | Right      | 2.09            | .0460         |

**Supplemental Table S1.** Exploratory regions-of-interest with significant group effects in either *normal – baseline* or *rhythm – baseline* contrasts ( $p < .05$ ). unc = uncorrected, MTO = middle temporo-occipital cortex, pMTg = posterior middle temporal gyrus, avSTs = anterior ventral superior temporal sulcus, Cbm = cerebellum, aFO = anterior frontal operculum, aMTg = anterior middle temporal gyrus.
