# Supplementary material
Source: PubMed Central journal article supplement (PMC8740675)
Supplement: JSLHR-64-2325-s023.pdf [file JSLHR-64-2325-s023.pdf]

| ROI                                                     | Hemisphere | <i>t</i> -value | <i>p</i> -unc |
|---------------------------------------------------------|------------|-----------------|---------------|
| <i>Normal-Baseline Correlation with SSI-Mod</i>         |            |                 |               |
| mdPMC                                                   | Right      | 3.05            | .0101         |
| aFO                                                     | Left       | 3.02            | .0107         |
|                                                         | Right      | 2.72            | .0185         |
| midPMC                                                  | Right      | 2.62            | .0222         |
| pdPMC                                                   | Left       | 2.49            | .0284         |
|                                                         | Right      | 2.37            | .0355         |
| aSMg                                                    | Right      | 2.43            | .0315         |
| SPL                                                     | Right      | 2.32            | .0389         |
| adPMC                                                   | Right      | 2.30            | .0400         |
| PO                                                      | Left       | 2.29            | .0406         |
| pFO                                                     | Right      | 2.21            | .0475         |
| PCN                                                     | Right      | 2.21            | .0475         |
| <i>Rhythm-Baseline Correlation with SSI-Mod</i>         |            |                 |               |
| SFg                                                     | Left       | -2.54           | .0262         |
| aTFg                                                    | Left       | 2.48            | .0291         |
| aCG                                                     | Left       | -2.33           | .0380         |
| aFO                                                     | Left       | 2.20            | .0484         |
| <i>Normal-Baseline Correlation with Disfluency Rate</i> |            |                 |               |
| aCO                                                     | Right      | 3.96            | .0019         |
|                                                         | Left       | 2.47            | .0298         |
| pCO                                                     | Right      | 3.36            | .0057         |
| aINS                                                    | Right      | 3.28            | .0065         |
| PO                                                      | Right      | 3.22            | .0073         |
| aiFs                                                    | Right      | 3.17            | .0081         |
| vSC                                                     | Right      | 2.50            | .0277         |
| MTO                                                     | Right      | 2.49            | .0285         |
| PT                                                      | Right      | 2.46            | .0300         |
| pvSTs                                                   | Right      | 2.42            | .0324         |
| pdSTs                                                   | Right      | 2.41            | .0329         |
| H                                                       | Right      | 2.39            | .0343         |
| pSMg                                                    | Right      | 2.37            | .0351         |
| pFO                                                     | Right      | 2.35            | .0364         |
| piFs                                                    | Right      | 2.30            | .0405         |
| aCG                                                     | Right      | 2.18            | .0496         |
| VA                                                      | Left       | 4.30            | .0010         |
|                                                         | Right      | 2.55            | .0254         |
| VL                                                      | Left       | 3.91            | .0021         |
|                                                         | Right      | 3.49            | .0045         |
| Cbm X                                                   | Left       | 2.73            | .0184         |
| Cbm iX                                                  | Left       | 2.54            | .0258         |
|                                                         | Right      | 2.42            | .0326         |
| Cbm V                                                   | Left       | 2.38            | .0347         |
| Putamen                                                 | Left       | 2.26            | .0431         |
| Cbm Vermis IX                                           | Midline    | 2.22            | .0462         |

**Supplemental Table S4.** Exploratory regions-of-interest with significant correlations between severity measures and speech activation in AWS ( $p < .05$ ). unc = uncorrected, mdPMC = middle dorsal premotor cortex, aFO = anterior frontal operculum, midPMC = middle premotor cortex, pdPMC = posterior dorsal premotor cortex, aSMg = anterior supramarginal gyrus, SPL = superior parietal lobule, adPMC = anterior dorsal premotor cortex, PO = parietal operculum, pFO = posterior frontal operculum, PCN = precuneus, SFg = superior frontal gyrus, aTFg = anterior temporal fusiform gyrus, aCG = anterior cingulate gyrus, aCO = anterior central operculum, pCO = posterior central operculum, aINS = anterior insula, aIFs = anterior inferior frontal sulcus, vSC = ventral primary somatosensory cortex, MTO = middle temporo-occipital cortex, PT = planum temporale, pvSTs = posterior ventral superior temporal sulcus, pdSTs = posterior dorsal superior temporal sulcus, H = Heschl's gyrus, pSMg = posterior supramarginal gyrus, pFO = posterior frontal operculum, pIFs = posterior inferior frontal sulcus, VA = ventral anterior portion of the thalamus, VL = ventral lateral portion of the thalamus, Cbm = cerebellum.
